# Supplementary material
Source: publisher site journal article supplement (https://www.dovepress.com/article/556186)
Supplement: Supplementary file 1 [file 556186%20Revised%20Supplementary%20Data.docx]

**Table S1. Inter-rater reliability by true diagnosis type**

|  | **Overall score** | | | **Assessment score** | | | **Incorrect content score** | | | **Potential for harm score** | | |
| --- | --- | --- | --- | --- | --- | --- | --- | --- | --- | --- | --- | --- |
|  | **Agreement (%)** | **Kappa** | **P-value** | **Agreement (%)** | **Kappa** | **P-value** | **Agreement (%)** | **Kappa** | **P-value** | **Agreement (%)** | **Kappa** | **P-value** |
| **Overall** | 48.57 | 0.241 | 0.0021 | 57.14 | 0.2279 | 0.0288 | 71.43 | 0.2473 | 0.0081 | 82.86 | 0.4488 | 0 |
| **Strabismus** | 36.36 | 0.0833 | 0.319 | 45.45 | 0.0571 | 0.3911 | 54.55 | 0.1538 | 0.1692 | -* | -* | -* |
| **Pseudostrabismus** | 54.17 | 0.2922 | 0.001 | 62.5 | 0.3203 | 0.0111 | 79.17 | 0.3103 | 0.0078 | 75 | 0.4217 | 0.0002 |
|  | *Too few observations to generate a Cohen’s kappa | | | | | |  |  |  |  |  |  |
